# Supplementary material
Source: MDPI journal article supplement (https://www.mdpi.com/1424-2818/15/3/463)
Supplement: s1 [file s1]

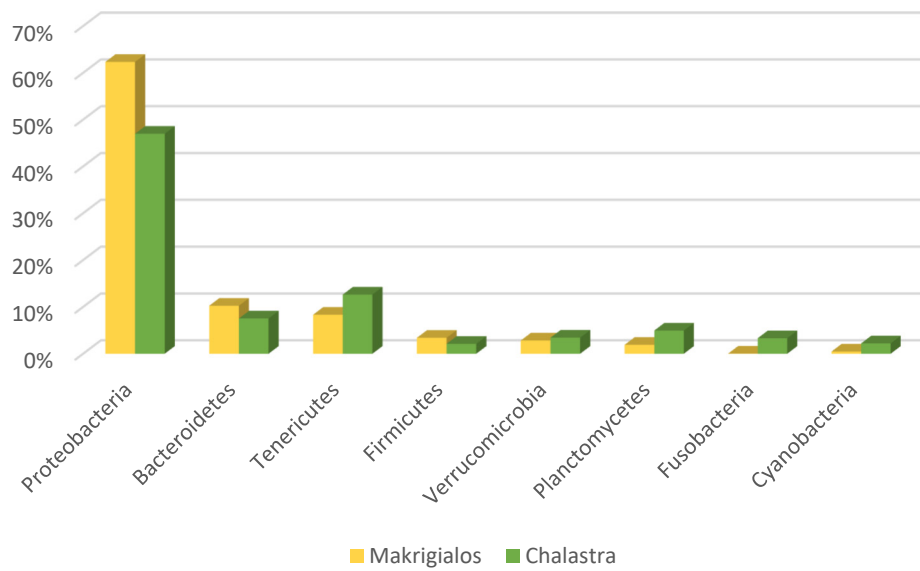

(a)

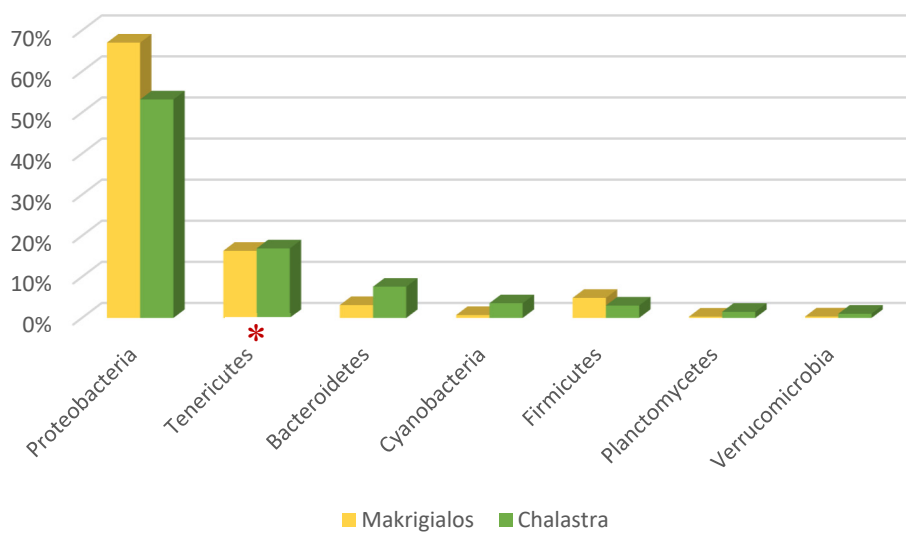

(b)

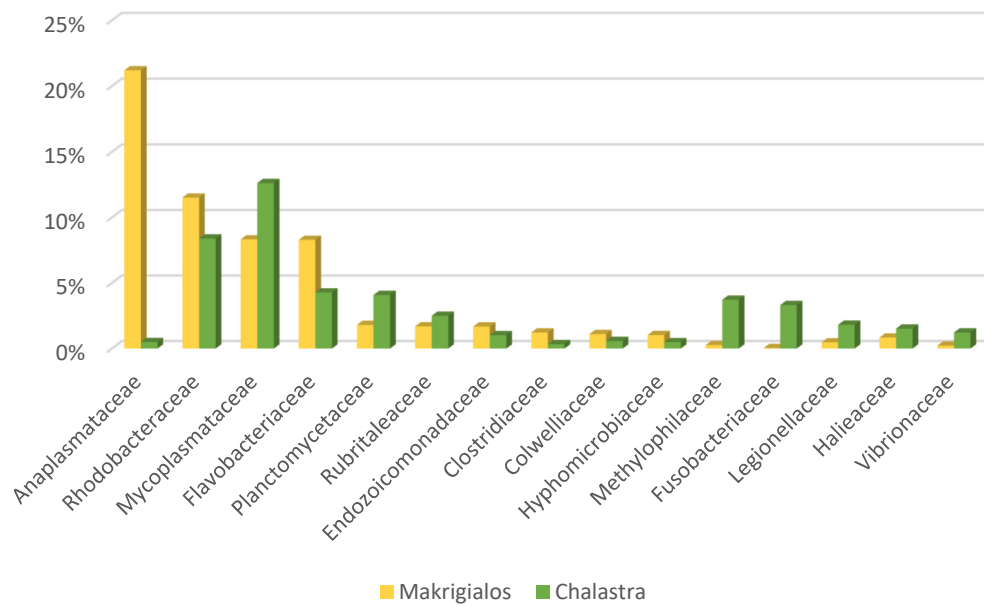

(c)

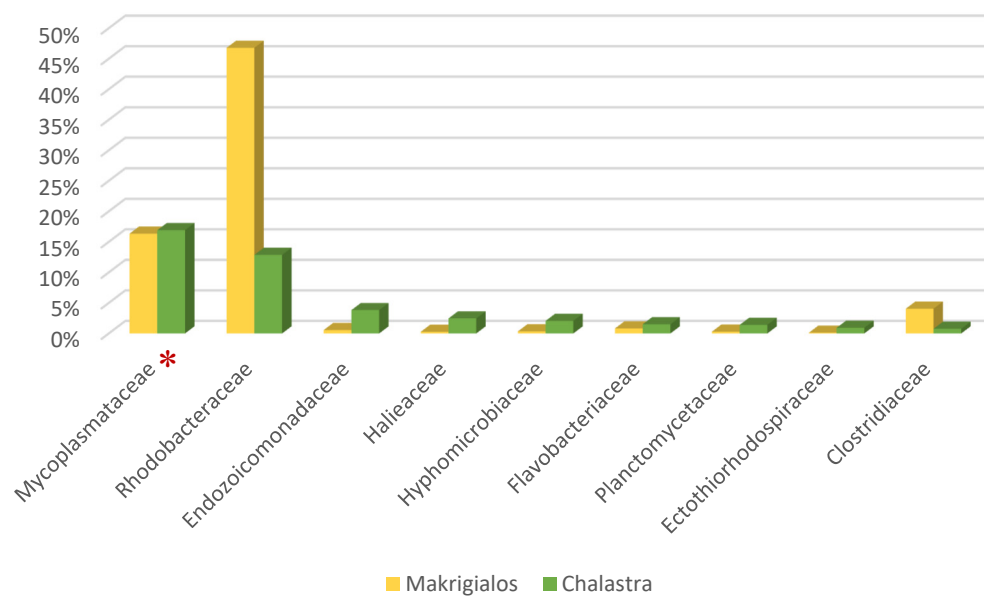

(d)

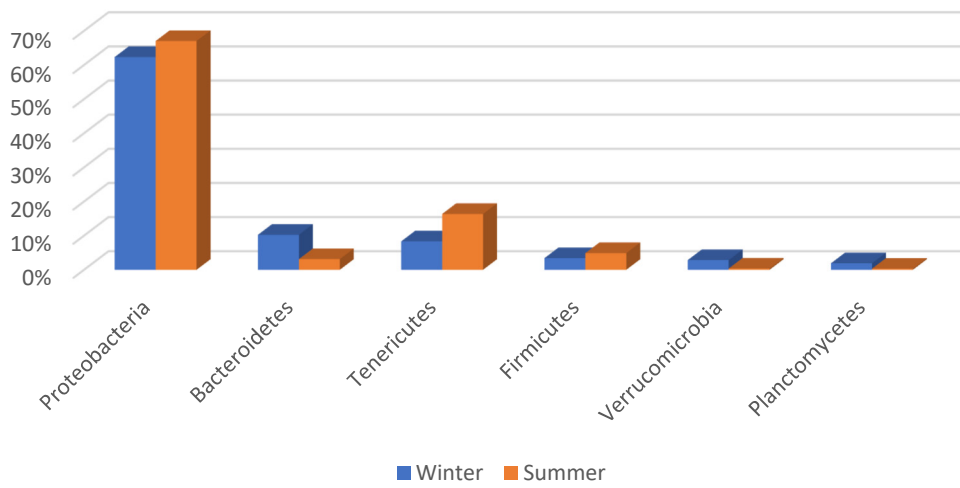

(e)

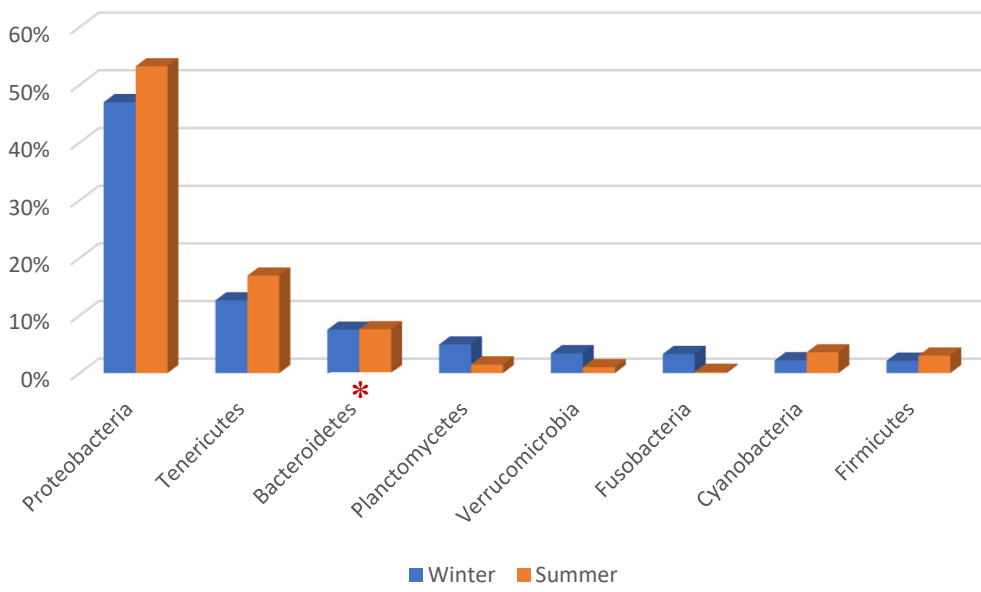

(f)

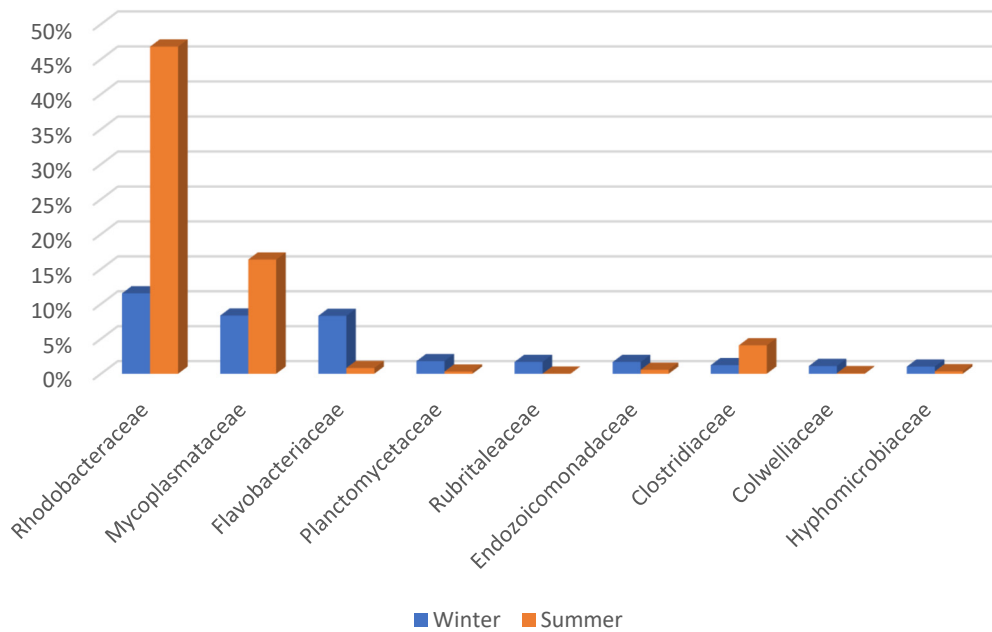

(g)

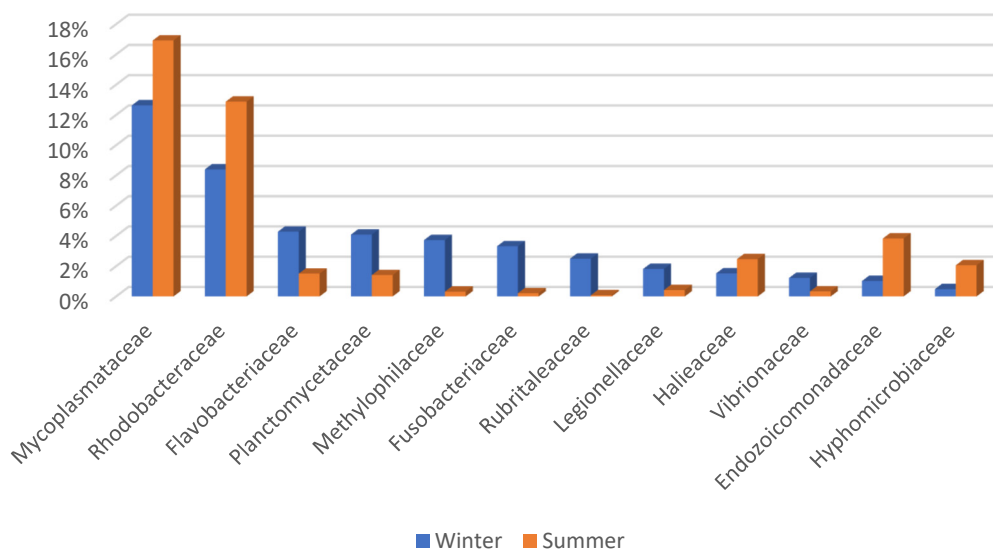

(h)

**Figure S1.** (a) Comparison of winter samples between Makrigialos - Chalastra at the phylum level. Each of the presented phyla differed significantly in relative abundance between Makrigialos and Chalastra ( $p < 0.00001$ ). (b) Comparison of summer samples between Makrigialos - Chalastra at the phylum level. Each of the presented families differed significantly in relative abundance between Makrigialos and Chalastra ( $p < 0.00001$ ), with the exception of Tenericutes ( $p = 0.11876$ ) (marked with an asterisk). (c) Comparison of winter samples between Makrigialos - Chalastra at the family level. Each of the presented families differed significantly in relative abundance between Makrigialos and Chalastra ( $p < 0.00001$ ). (d) Comparison of summer samples between Makrigialos - Chalastra at the family level. Each of the presented families differed significantly in relative abundance between Makrigialos and Chalastra ( $p < 0.00001$ ), with the exception of Mycoplasmataceae ( $p = 0.12114$ ) (marked with an asterisk). (e) Comparison of Makrigialos samples between winter - summer at the phylum level. Each of the presented phyla differed significantly in relative abundance between winter

and summer ( $p < 0.00001$ ). **(f)** Comparison of Chalastra samples between winter - summer at the phylum level. Each of the presented phyla differed significantly in relative abundance between winter and summer ( $p < 0.00001$ ), with the exception of Bacteroidetes ( $p = 0.35238$ ) (marked with an asterisk). **(g)** Comparison of Makrigialos samples between winter - summer at the family level. Each of the presented families differed significantly in relative abundance between winter and summer ( $p < 0.00001$ ). **(h)** Comparison of Chalastra samples between winter - summer at the family level. Each of the presented families differed significantly in relative abundance between winter and summer ( $p < 0.00001$ ).
